# Supplementary material for: Sjögren's Versus Non-Sjögren's Ocular Features: Similar Symptoms, But Significantly Worse Signs
Source: PubMed Central journal article supplement — Invest Ophthalmol Vis Sci. 2024 Jan 9;65(1):23. doi: 10.1167/iovs.65.1.23 (PMC10784845; doi:10.1167/iovs.65.1.23), 2024-01-09
Supplement: iovs-65-1-23_s001.pdf [file iovs-65-1-23_s001.pdf]

Supplementary Table 1. Comparisons of ocular staining patterns between participants classified as SjD and non-SjD based on constituent components of the ocular staining score, including nasal and temporal conjunctival staining with lissamine green and corneal staining with fluorescein.

| Staining score               | Non-SjD     |             | SjD         |             | OR (95% CI)         | P       |
|------------------------------|-------------|-------------|-------------|-------------|---------------------|---------|
|                              | Right       | Left        | Right       | Left        |                     |         |
| Temporal conjunctiva         |             |             |             |             | 4.71 (4.16 to 5.34) | < 0.001 |
| 0                            | 887 (48.0%) | 628 (34.0%) | 238 (15.5%) | 155 (10.1%) |                     |         |
| 1                            | 559 (30.2%) | 631 (34.1%) | 238 (15.5%) | 243 (15.9%) |                     |         |
| 2                            | 240 (13.0%) | 335 (18.1%) | 286 (18.7%) | 314 (20.5%) |                     |         |
| 3                            | 161 (8.7%)  | 253 (13.7%) | 770 (50.3%) | 819 (53.5%) |                     |         |
| Cornea                       |             |             |             |             | 3.51 (3.10 to 3.98) | < 0.001 |
| 0                            | 647 (35.0%) | 629 (34.0%) | 210 (13.7%) | 188 (12.3%) |                     |         |
| 1                            | 498 (26.9%) | 501 (27.1%) | 239 (15.6%) | 231 (15.1%) |                     |         |
| 2                            | 281 (15.2%) | 261 (14.1%) | 234 (15.3%) | 230 (15.0%) |                     |         |
| 3                            | 177 (9.6%)  | 201 (10.9%) | 189 (12.3%) | 196 (12.8%) |                     |         |
| 4                            | 139 (7.5%)  | 150 (8.1%)  | 245 (16.0%) | 288 (18.8%) |                     |         |
| 5                            | 82 (4.4%)   | 82 (4.4%)   | 316 (20.6%) | 294 (19.2%) |                     |         |
| 6                            | 23 (1.2%)   | 23 (1.2%)   | 98 (6.4%)   | 104 (6.8%)  |                     |         |
| Nasal conjunctiva            |             |             |             |             | 4.68 (4.13 to 5.30) | < 0.001 |
| 0                            | 654 (35.4%) | 856 (46.3%) | 177 (11.6%) | 216 (14.1%) |                     |         |
| 1                            | 633 (34.3%) | 574 (31.1%) | 240 (15.7%) | 255 (16.6%) |                     |         |
| 2                            | 318 (17.2%) | 242 (13.1%) | 298 (19.5%) | 305 (19.9%) |                     |         |
| 3                            | 242 (13.1%) | 175 (9.5%)  | 817 (53.3%) | 755 (49.3%) |                     |         |
| Cornea staining pattern      |             |             |             |             |                     |         |
| Punctate epithelial erosions |             |             |             |             | 3.42 (3.02 to 3.87) | < 0.001 |
| 0                            | 652 (35.3%) | 638 (34.5%) | 218 (14.2%) | 195 (12.7%) |                     |         |
| 1                            | 528 (28.6%) | 518 (28.0%) | 273 (17.8%) | 264 (17.2%) |                     |         |
| 2                            | 364 (19.7%) | 380 (20.6%) | 325 (21.2%) | 338 (22.1%) |                     |         |
| 3                            | 303 (16.4%) | 311 (16.8%) | 715 (46.7%) | 734 (47.9%) |                     |         |

|                               |             |             |             |             |                     |         |
|-------------------------------|-------------|-------------|-------------|-------------|---------------------|---------|
| Staining in pupillary area    | 242 (13.1%) | 253 (13.7%) | 518 (33.8%) | 518 (33.8%) | 3.30 (2.92 to 3.72) | < 0.001 |
| Filaments on cornea           | 38 (2.1%)   | 37 (2.0%)   | 144 (9.4%)  | 147 (9.6%)  | 5.01 (3.87 to 6.49) | < 0.001 |
| Patches of confluent staining | 250 (13.5%) | 273 (14.8%) | 692 (45.2%) | 718 (46.9%) | 5.17 (4.60 to 5.81) | < 0.001 |

---

Abbreviations: CI, confidence interval; OR, odds ratio; SjD, Sjögren's disease.
